# Supplementary material for: Transcriptome-wide analysis of epitranscriptome and translational efficiency associated with heterosis in maize
Source: PubMed Central journal article supplement (PMC8023220; doi:10.1093/jxb/erab074), 2021-02-19
Supplement: erab074_suppl_supplementary-figures-s1-s6.pdf [file erab074_suppl_supplementary-figures-s1-s6.pdf]

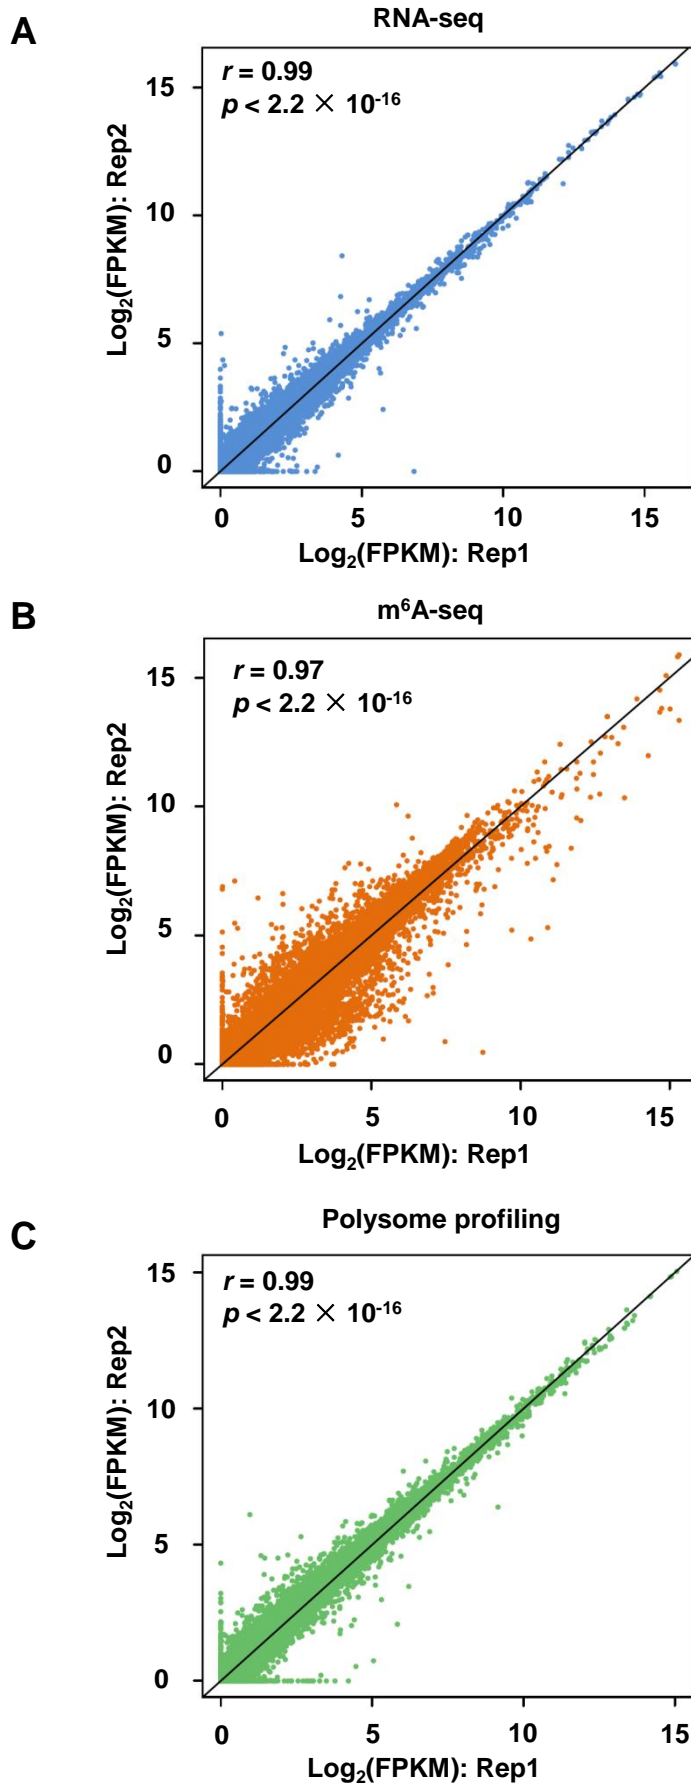

Figure S1. The repeatability between two biological replicates for RNA-seq data (A), m<sup>6</sup>A-seq data (B) and polysome profiling data (C) in hybrid. The Pearson correlation coefficient ( $r$ ) and  $p$ -values are shown in the top left corner.

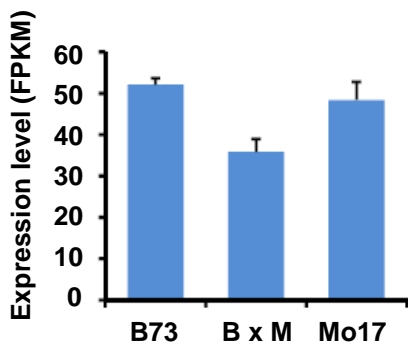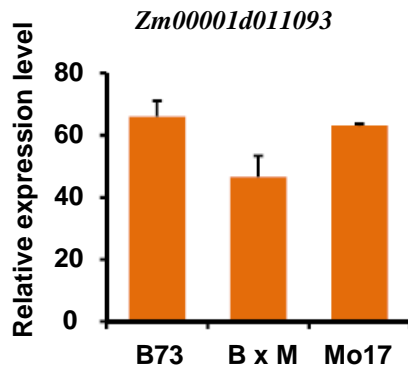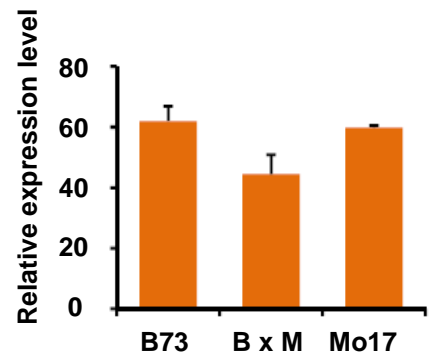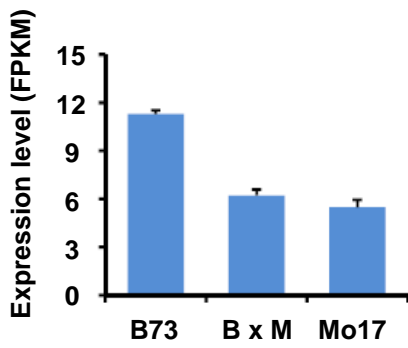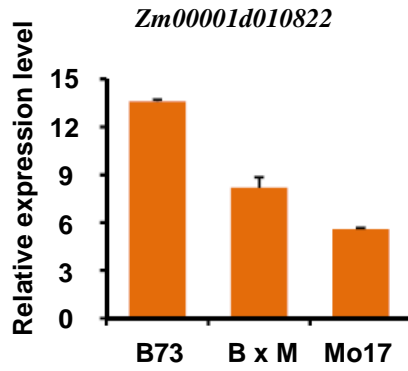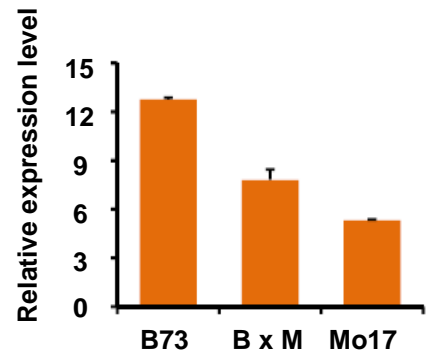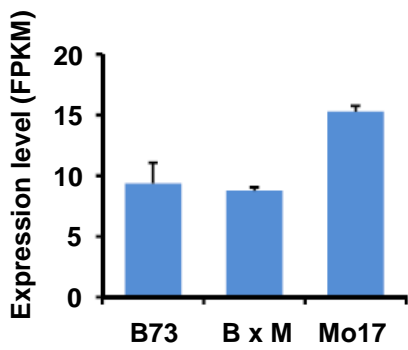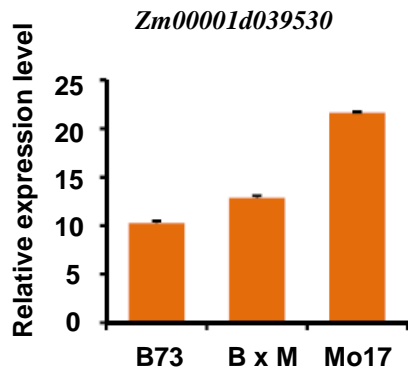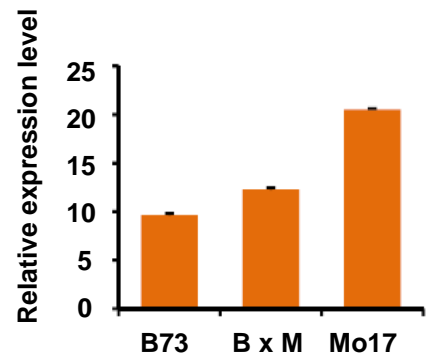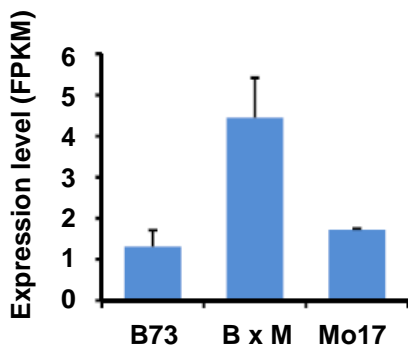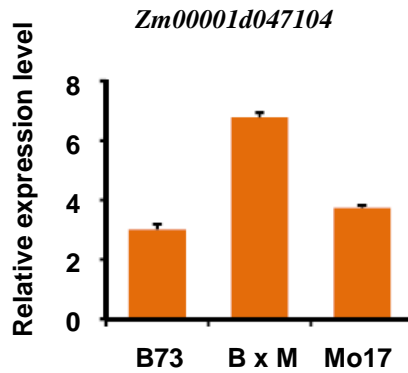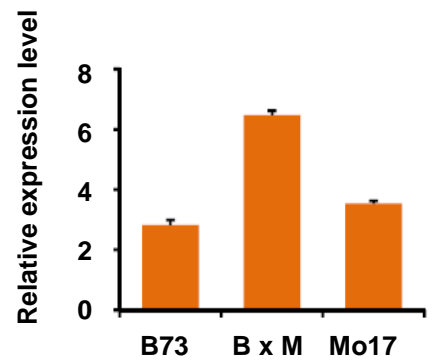

Continued

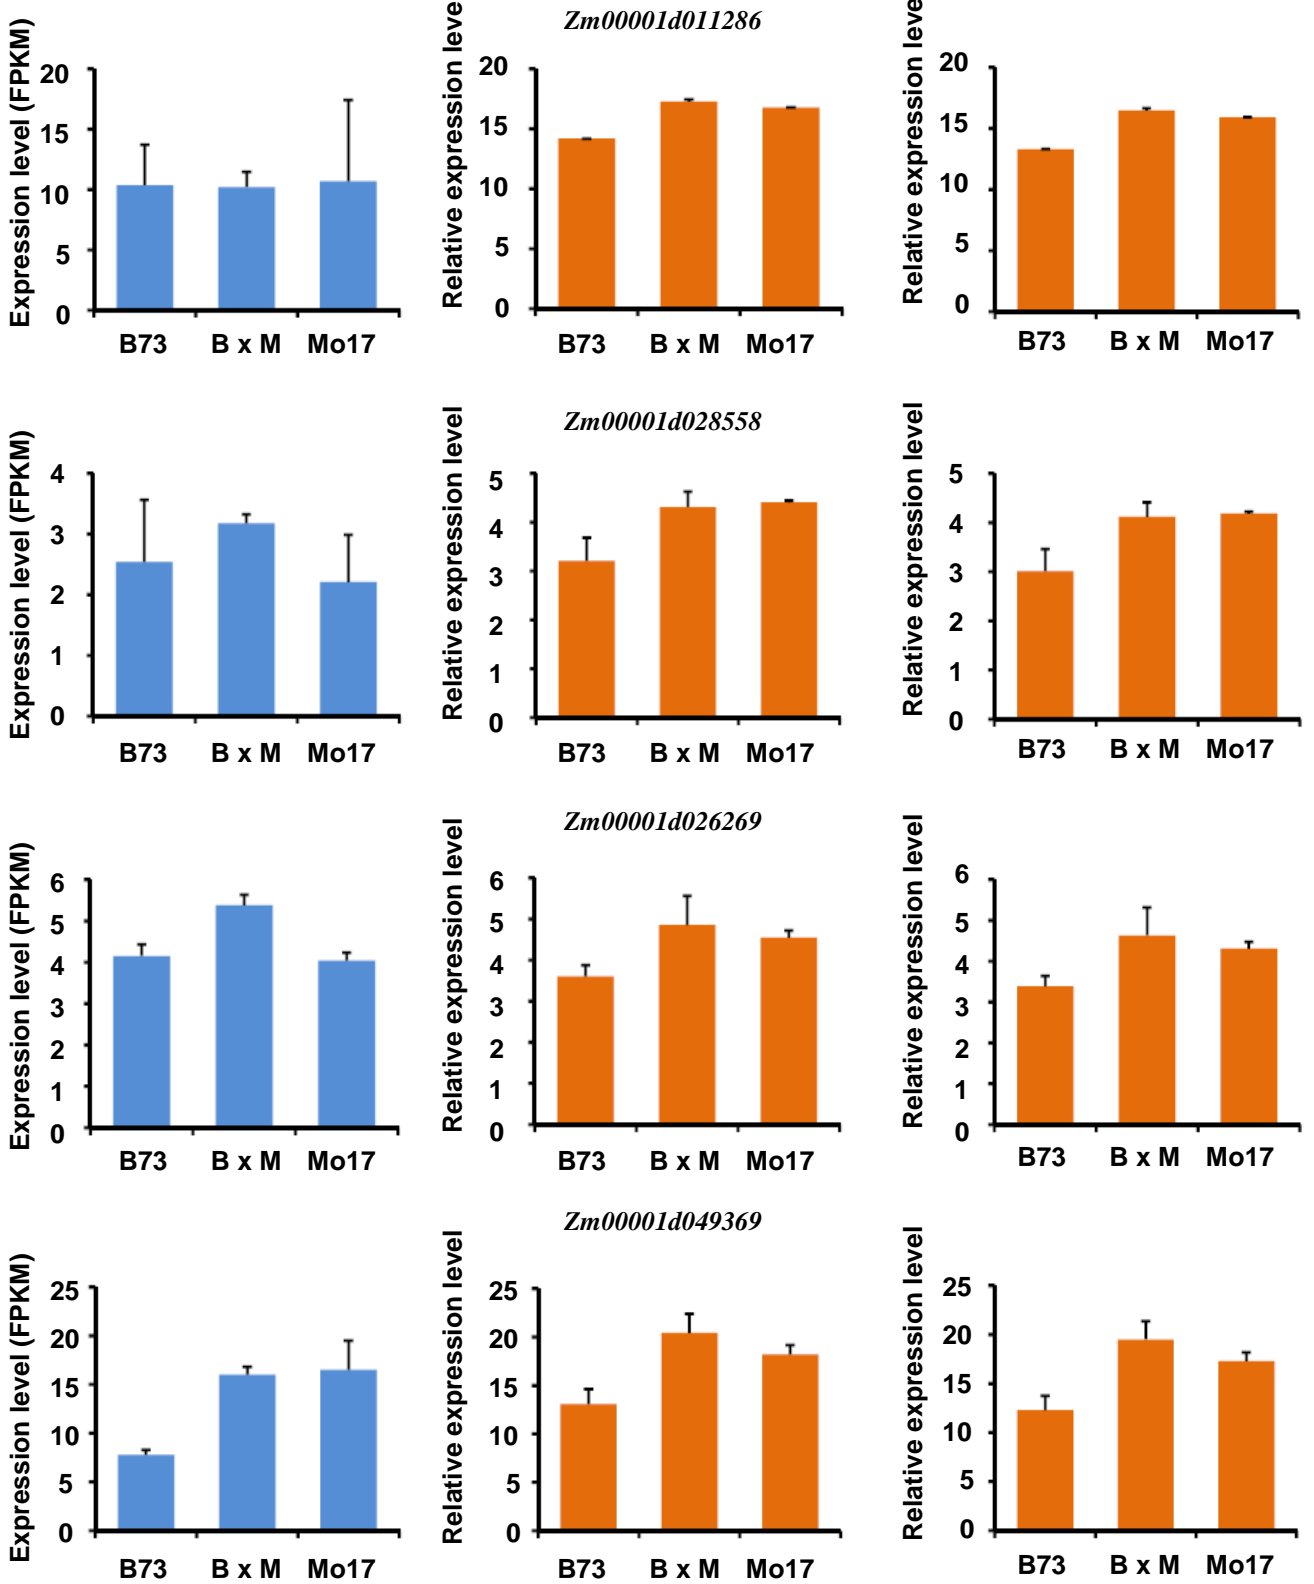

Figure S2. RT-qPCR validation of eight genes at the mRNA level in  $F_1$  hybrid B73  $\times$  Mo17 and its two parental lines B73 and Mo17. The mRNA levels were determined by RNA-seq (blue) or RT-qPCR (red), respectively. The relative mRNA level of each gene was compared to the internal control genes *Zm00001d034600* (middle) and *Zm00001d042939* (right). Data are represented as means + s.d. of two independent biological replicates.

*Zm00001d011093*

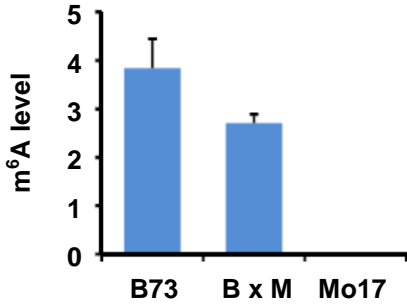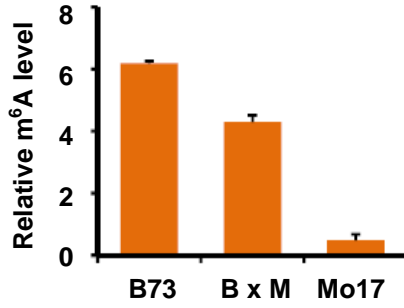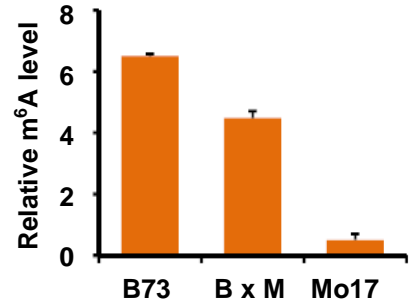

*Zm00001d010822*

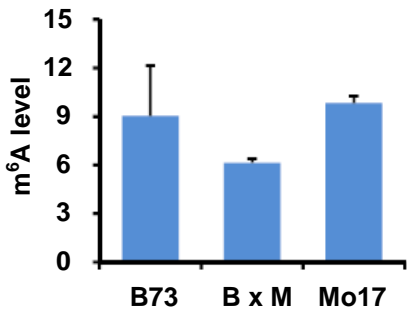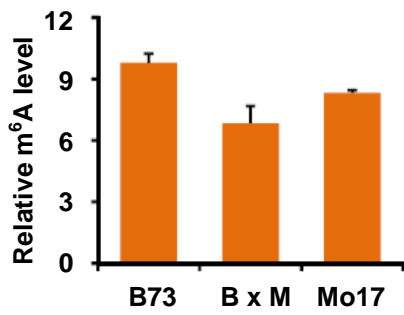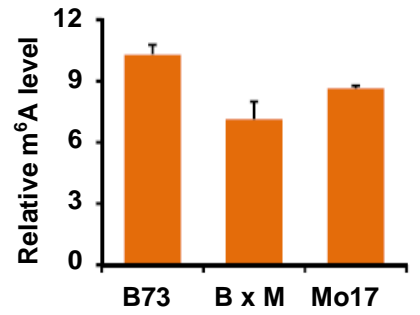

*Zm00001d039530*

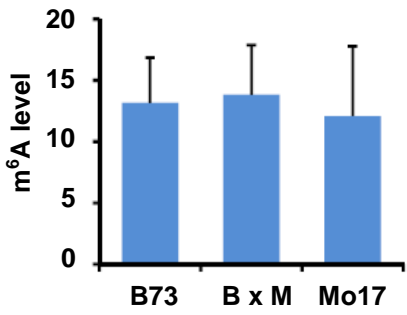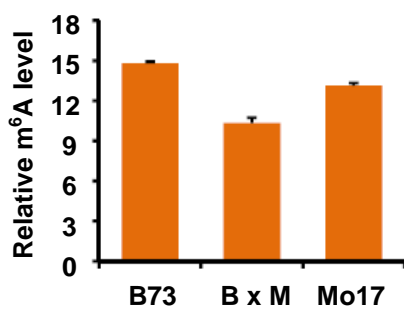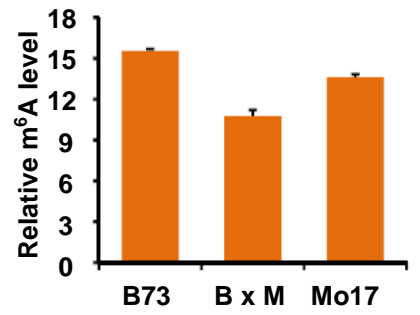

*Zm00001d047104*

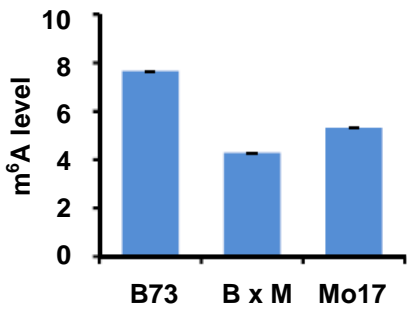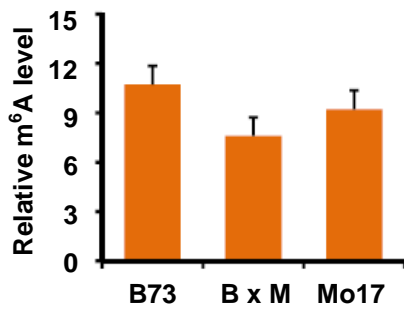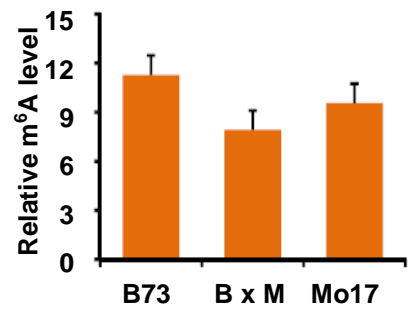

Continued

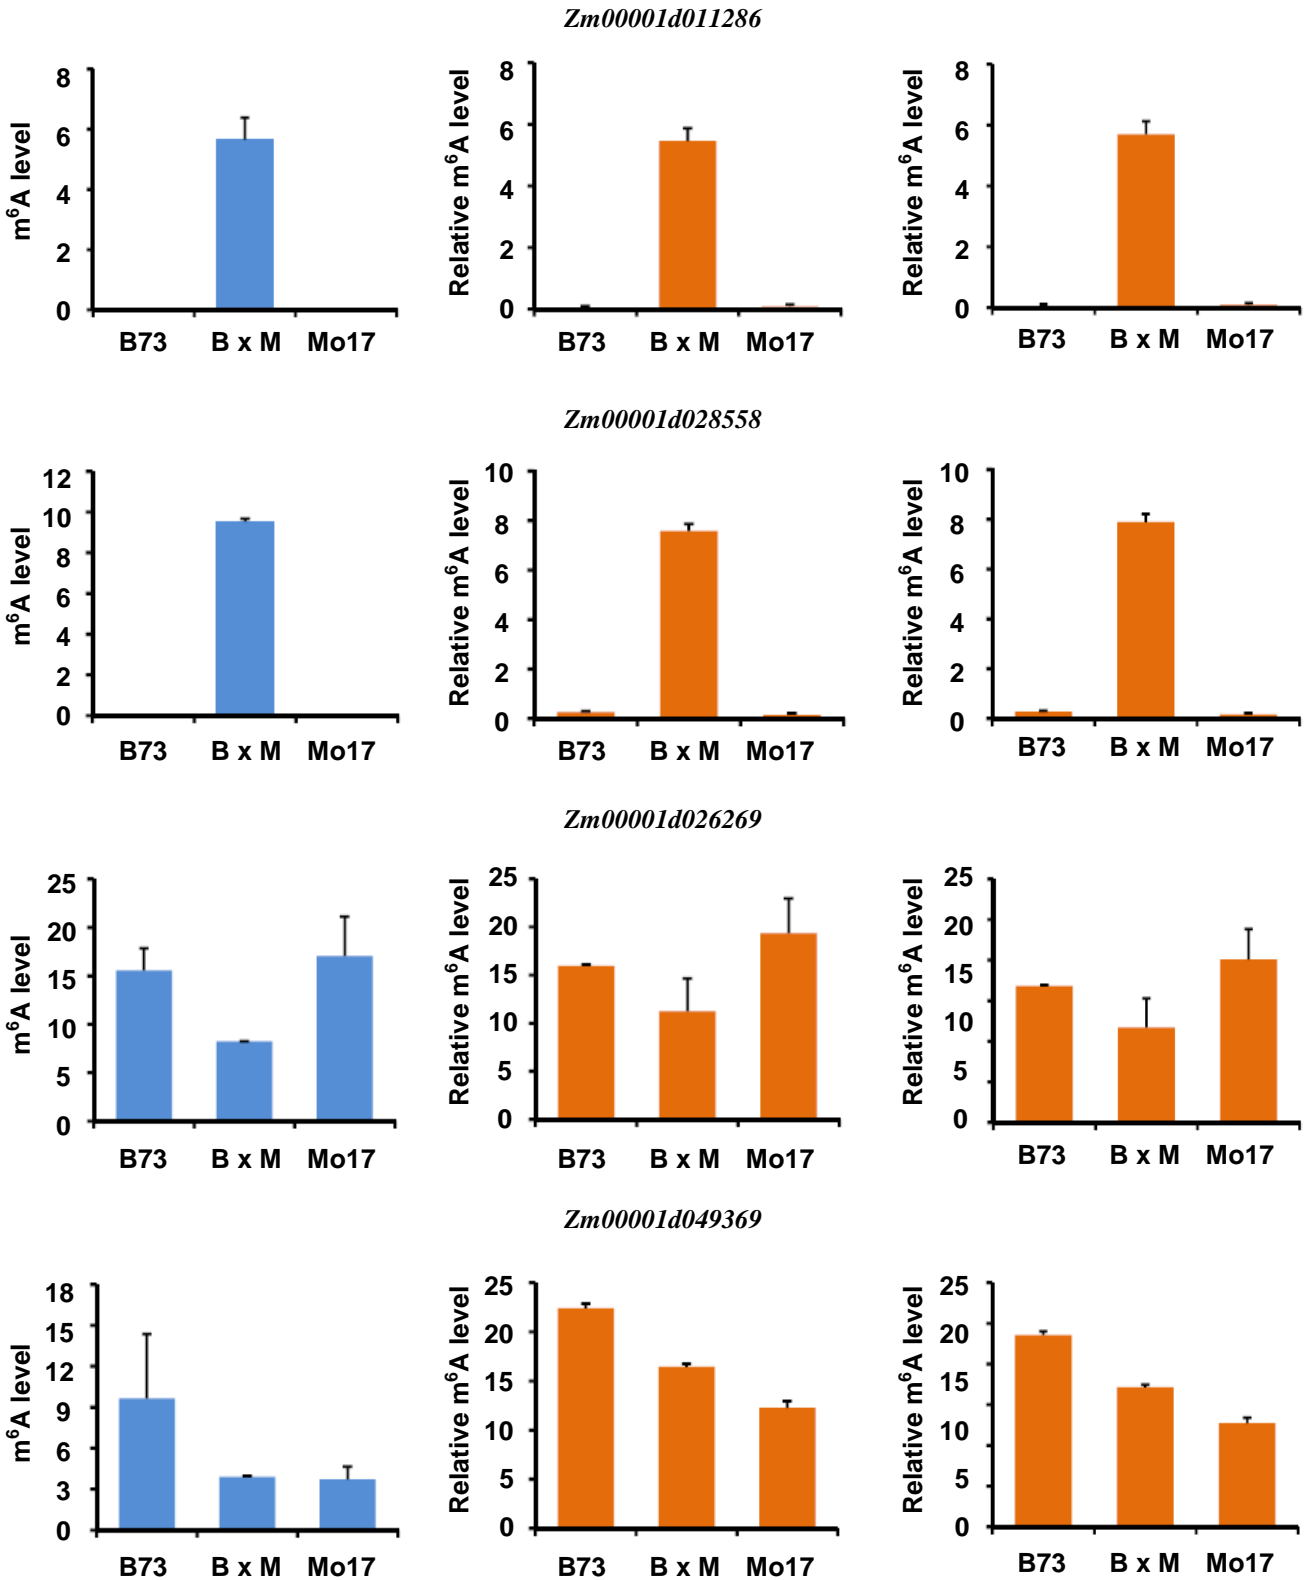

Figure S3. RT-qPCR validation of eight genes at the m<sup>6</sup>A level in F<sub>1</sub> hybrid B73 × Mo17 and its two parental lines B73 and Mo17. The m<sup>6</sup>A levels determined by m<sup>6</sup>A-seq (blue) or RT-qPCR (red), respectively. The relative m<sup>6</sup>A level of each gene was compared to the internal control genes *Zm00001d034600* (middle) and *Zm00001d042939* (right). Data are represented as means + s.d of two independent biological replicates.

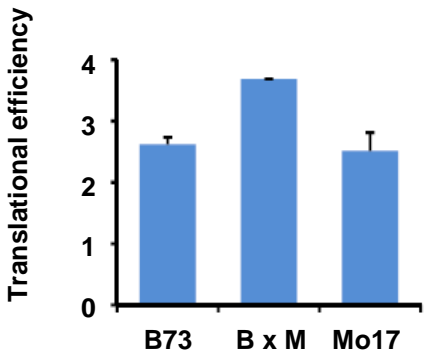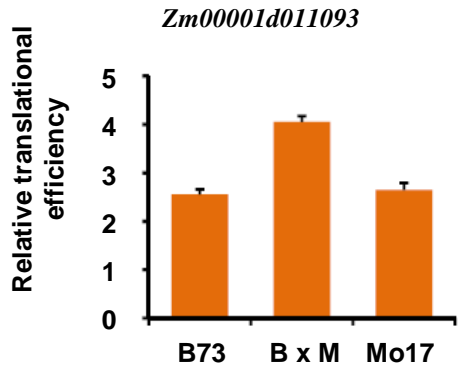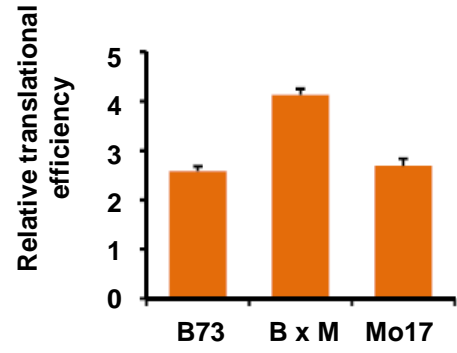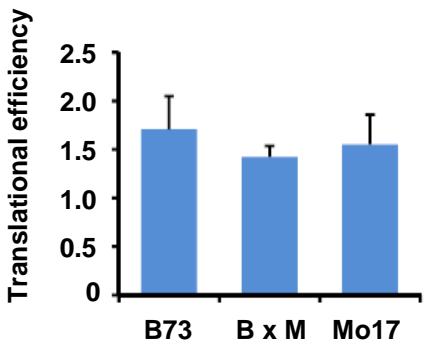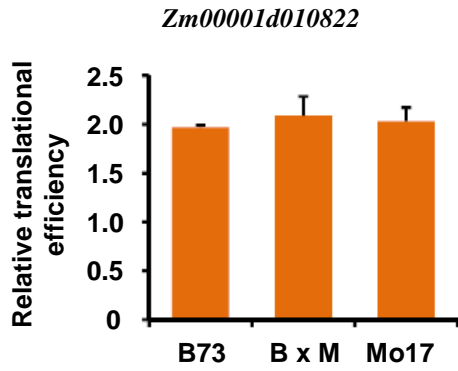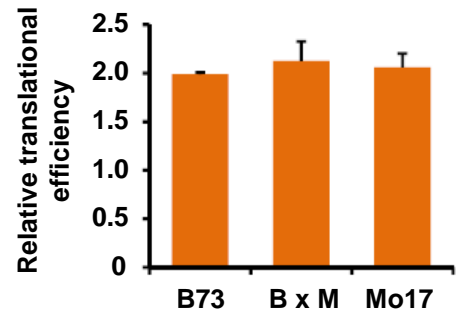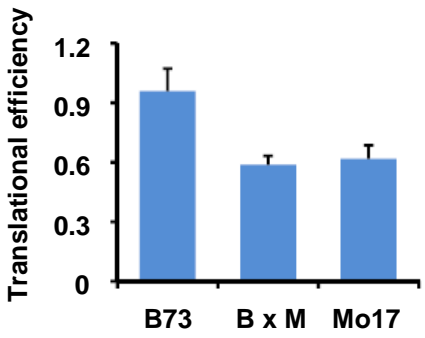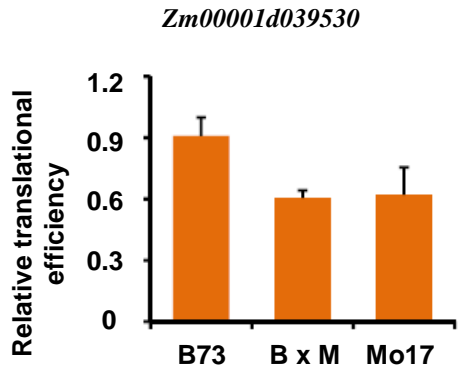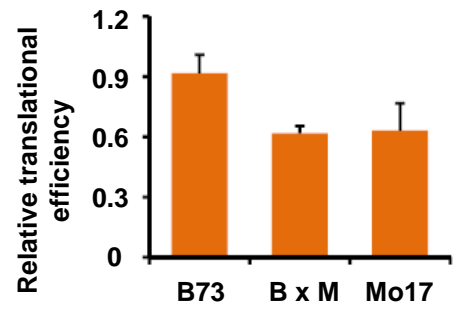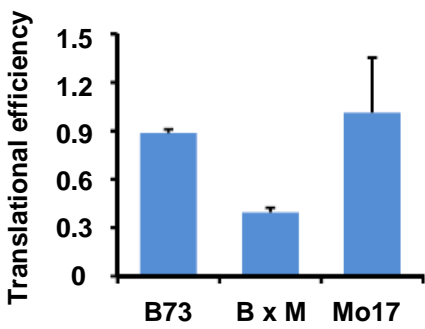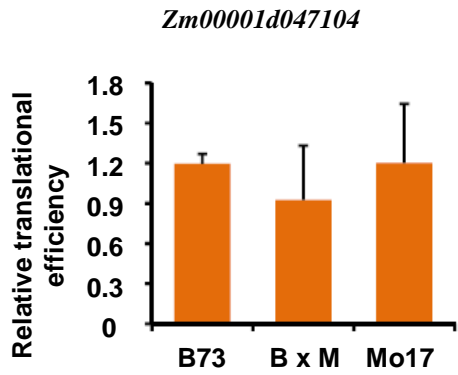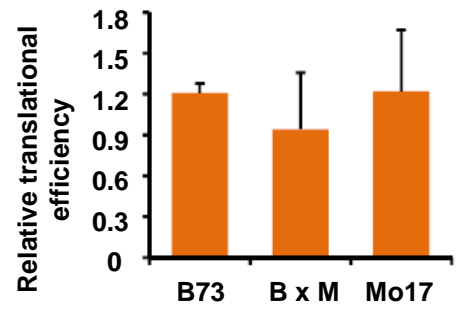

Continued

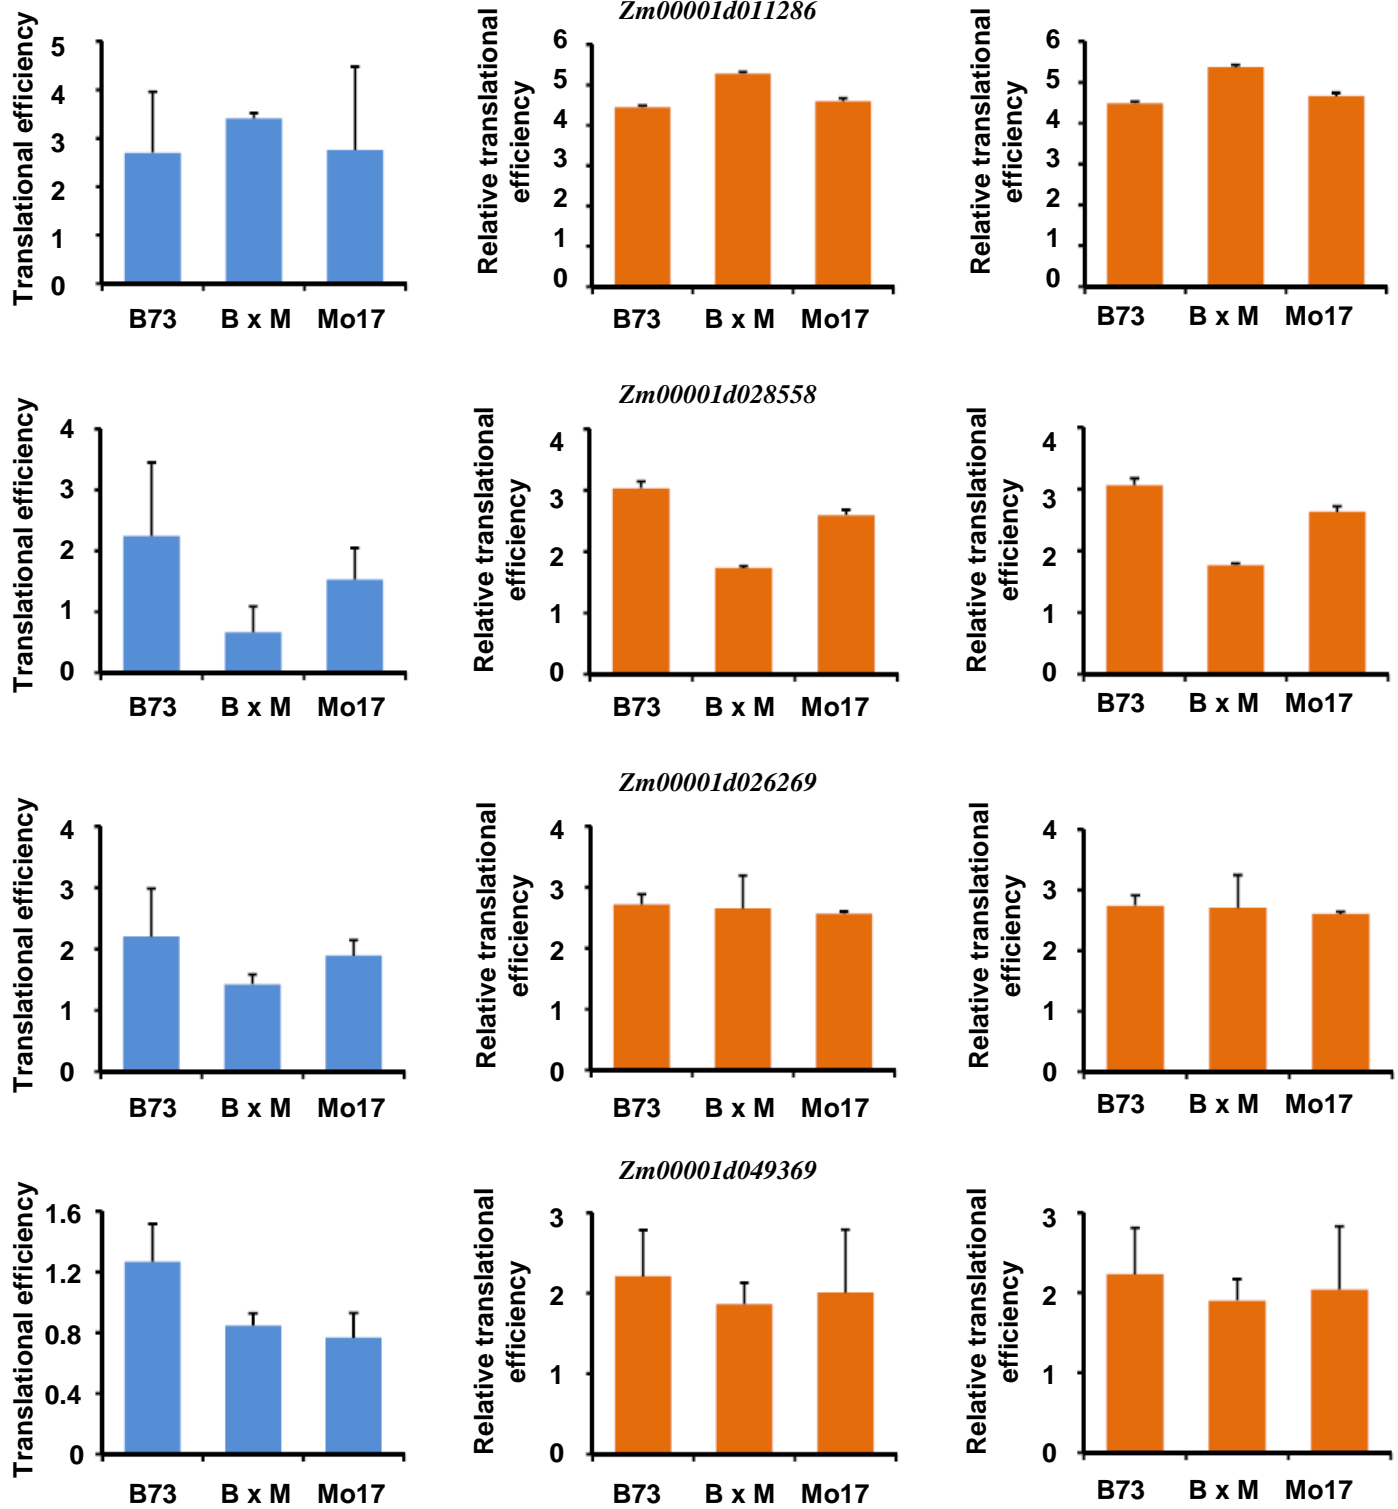

Figure S4. RT-qPCR validation of selected eight genes at the level of translational efficiency in F<sub>1</sub> hybrid B73 × Mo17 and its two parental lines B73 and Mo17. The translational efficiency was determined by polysome profiling sequencing (blue) or RT-qPCR (red), respectively. The relative translational efficiency of each gene was compared to the internal control genes *Zm00001d034600* (middle) and *Zm00001d042939* (right). Data are represented as means + s.d. of two independent biological replicates.

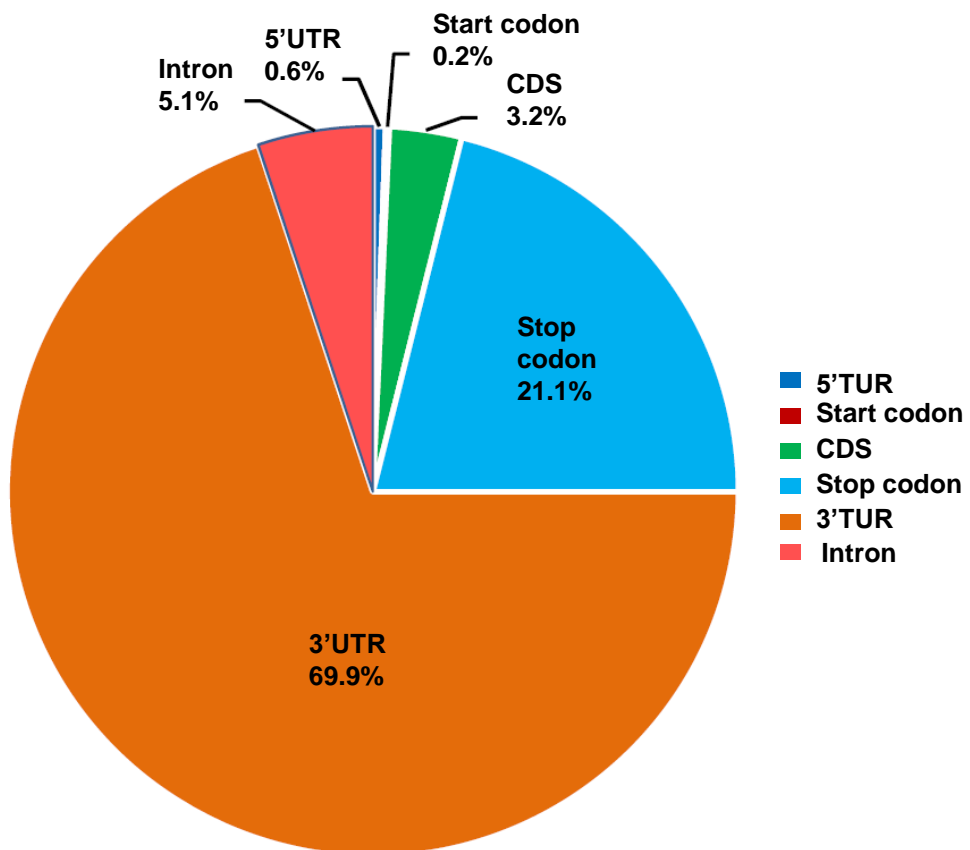

Figure S5. Pie-chart depicting the percentage of m<sup>6</sup>A peaks within six transcript segments in hybrid.



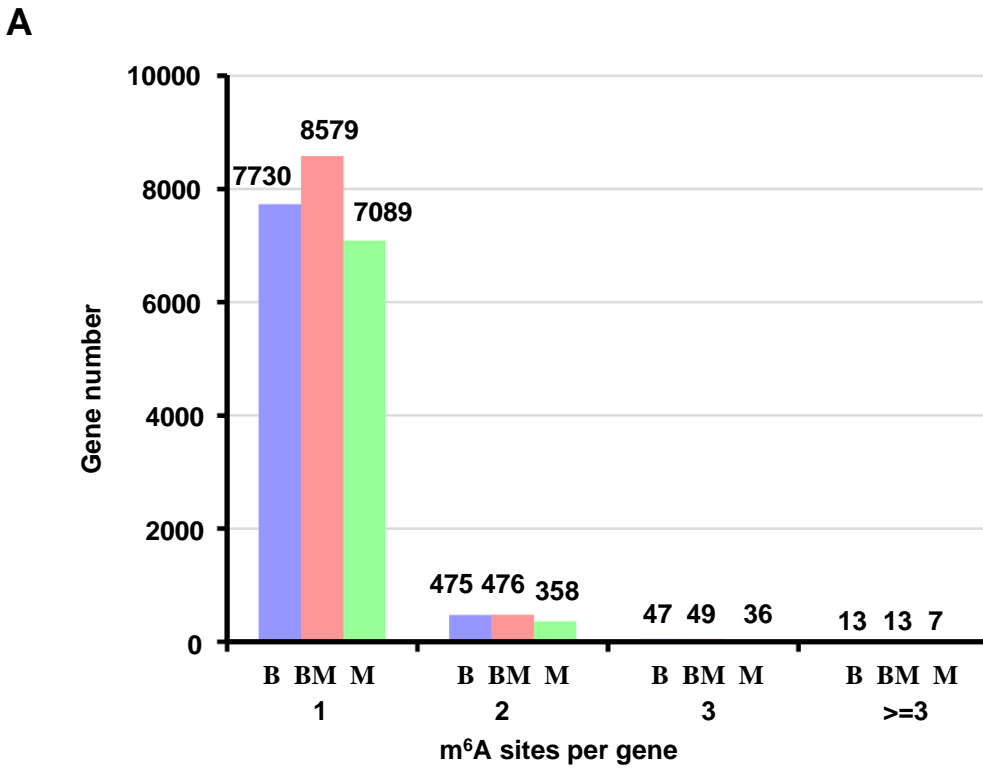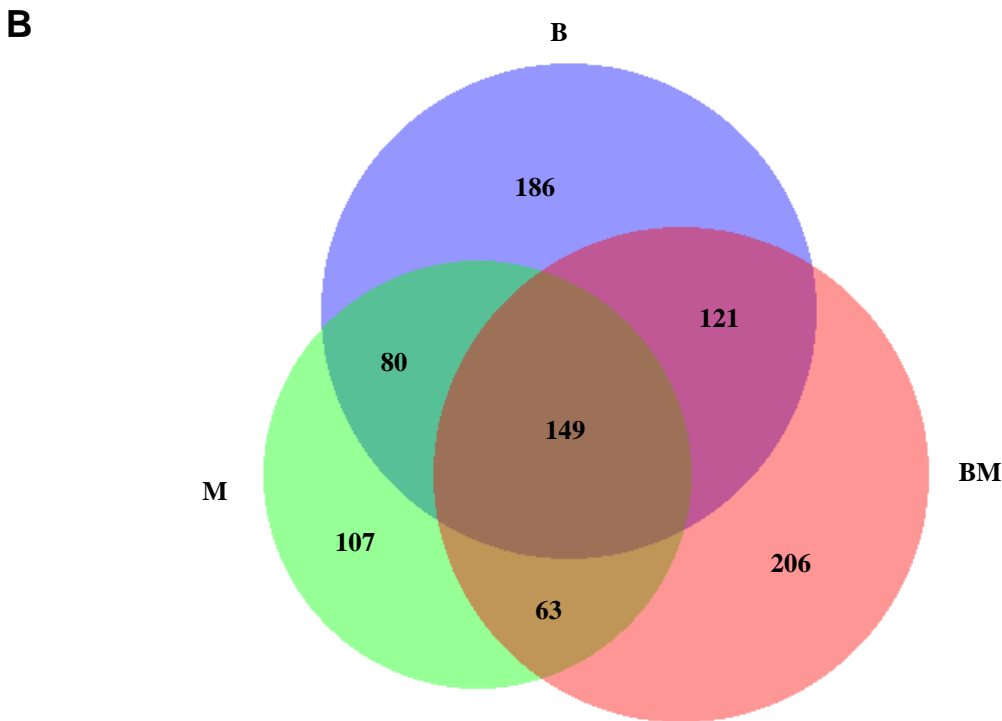

Figure S6. Comparison of gene numbers containing multiple m<sup>6</sup>A peaks between hybrid and parents.

(A) No. of genes containing different number of m<sup>6</sup>A peak between hybrid and parents.

(B) Venn diagram showing the overlap of genes containing multiple m<sup>6</sup>A peak per gene between hybrid and parents. B, B73; M, Mo17; BM, B73 x Mo17.
